# Supplementary material for: Reversible Luminescent Switching Induced by Heat/Water Treatment in a Zero-Dimensional Hybrid Antimony(Ⅲ) Chloride
Source: MDPI journal article supplement (doi:10.3390/molecules28041978), 2023-02-19
Supplement: s1 [file s1]

*Electronic Supporting Information:*

## **Reversible Luminescent Switching Induced by Heat/Water Treatment in a Zero-Dimensional Hybrid Antimony(III) Chloride**

**Ying-Chen Peng**<sup>1,†</sup>, **Hao-Wei Lin**<sup>1,2,†</sup>, **Sheng-Hua Zhou**<sup>1,†</sup>, **Jian-Ce Jin**<sup>1</sup>, **Ting-Hui Zhuang**<sup>1,3</sup>, **Abdusalam Ablez**<sup>1,2</sup>, **Ze-Ping Wang**<sup>1</sup>, **Ke-Zhao Du**<sup>3</sup> and **Xiao-Ying Huang**<sup>1,\*</sup>

<sup>1</sup> State Key Laboratory of Structural Chemistry, Fujian Institute of Research on the Structure of Matter, Chinese Academy of Sciences, Fuzhou 350002, China

<sup>2</sup> College of Chemistry, Fuzhou University, Fuzhou 350116, China

<sup>3</sup> Fujian Provincial Key Laboratory of Advanced Materials Oriented Chemical Engineering, Fujian Normal University, Fuzhou 350007, China

\* Correspondence: xyhuang@fjirsm.ac.cn, Fax: +86-591-6317-3145

† These authors contributed equally to this work.

**Table S1.** Crystal data and structure refinement details for [H<sub>2</sub>BPZ][SbCl<sub>5</sub>]•H<sub>2</sub>O at 293 K.

|                                                     |                                                                    |
|-----------------------------------------------------|--------------------------------------------------------------------|
| CCDC number                                         | 2220612                                                            |
| Empirical formula                                   | C <sub>11</sub> H <sub>20</sub> Cl <sub>5</sub> N <sub>2</sub> OSb |
| Formula weight                                      | 495.29                                                             |
| Temperature/K                                       | 293(2) K                                                           |
| Wavelength/Å                                        | 0.71073                                                            |
| Crystal system                                      | monoclinic                                                         |
| Space group                                         | <i>P</i> 2 <sub>1</sub> / <i>c</i>                                 |
| <i>a</i> /Å                                         | 15.1814(14)                                                        |
| <i>b</i> /Å                                         | 12.1122(11)                                                        |
| <i>c</i> /Å                                         | 10.4217(11)                                                        |
| <i>α</i> /°                                         | 90                                                                 |
| <i>β</i> /°                                         | 103.164(10)                                                        |
| <i>γ</i> /°                                         | 90                                                                 |
| <i>V</i> /Å <sup>3</sup>                            | 1866.0(3)                                                          |
| <i>Z</i>                                            | 4                                                                  |
| $\rho_{\text{calc}}$ g/cm <sup>3</sup>              | 1.763                                                              |
| Absorption coefficient/mm <sup>-1</sup>             | 2.191                                                              |
| <i>F</i> (000)                                      | 976                                                                |
| Crystal size/mm <sup>3</sup>                        | 0.200 × 0.100 × 0.050                                              |
| Theta range for data collection /°                  | 2.174 – 29.729                                                     |
| Limiting indices                                    | -20 ≤ <i>h</i> ≤ 20, -16 ≤ <i>k</i> ≤ 16, -12 ≤ <i>l</i> ≤ 12      |
| Reflections collected/ unique                       | 4789/4789                                                          |
| Completeness to theta                               | 25.242, 100.0 %                                                    |
| Absorption correction                               | Semi-empirical from equivalents                                    |
| Refinement method                                   | Full-matrix least-squares on <i>F</i> <sup>2</sup>                 |
| Data/restraints/parameters                          | 4789/2/189                                                         |
| Goodness-of-fit on <i>F</i> <sup>2</sup>            | 1.074                                                              |
| Final <i>R</i> indexes [ <i>I</i> ≥ 2σ( <i>I</i> )] | <i>R</i> <sup>1</sup> = 0.0411, <i>wR</i> <sup>2</sup> = 0.0722    |
| Final <i>R</i> indexes [all data]                   | <i>R</i> <sup>1</sup> = 0.0785, <i>wR</i> <sup>2</sup> = 0.0889    |
| Extinction coefficient                              | 0.00159(18)                                                        |
| Largest diff. peak and hole/e Å <sup>-3</sup>       | 0.752, -0.778                                                      |

[a]  $R_1 = \sum \|F_o| - |F_c| \| / \sum |F_o|$ , [b]  $wR_2 = [\sum w(F_o^2 - F_c^2)^2 / \sum w(F_o^2)^2]^{1/2}$

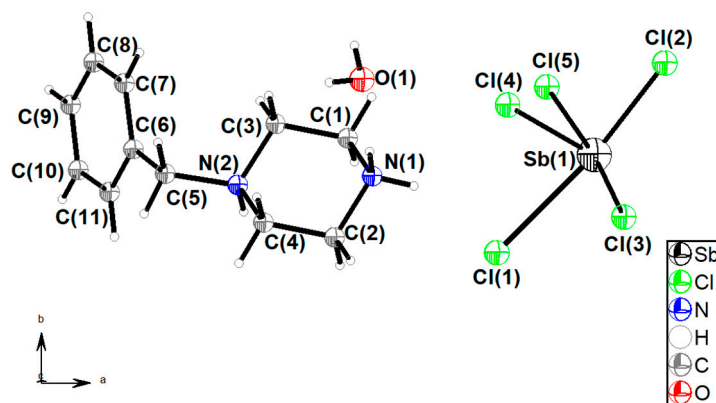

**Figure S1.** ORTEP drawing (50% ellipsoid probability) of the asymmetric unit of  $[\text{H}_2\text{BPZ}][\text{SbCl}_5]\cdot\text{H}_2\text{O}$  at 293 K.

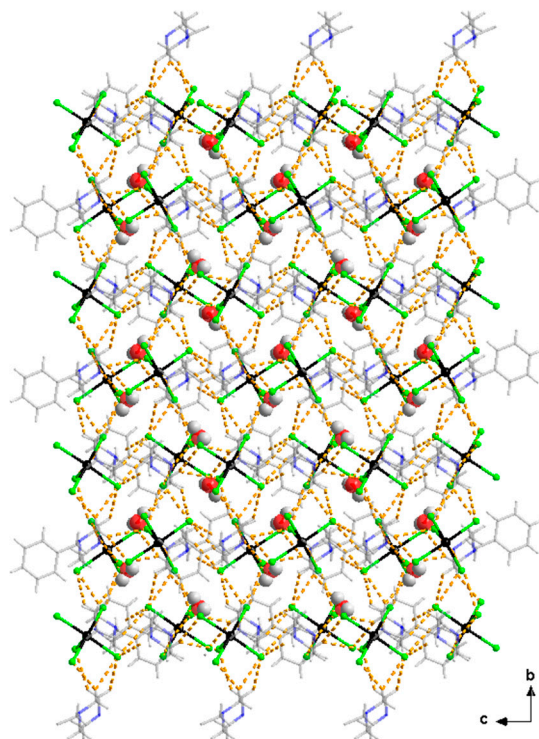

**Figure S2.** A supramolecular layer in  $[\text{H}_2\text{BPZ}][\text{SbCl}_5]\cdot\text{H}_2\text{O}$  viewed along the  $a$  axis in which lattice water molecules are located; water molecules are in CPK mode; hydrogen bonds with water molecules are not shown.

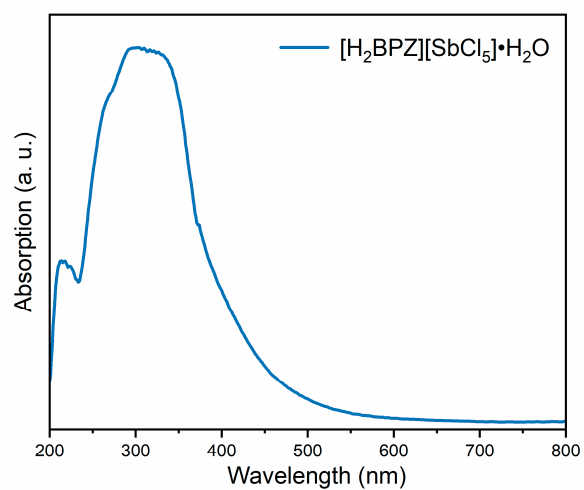

**Figure S3.** Solid-state UV-visible absorption spectrum of  $[\text{H}_2\text{BPZ}][\text{SbCl}_5] \cdot \text{H}_2\text{O}$  at RT.

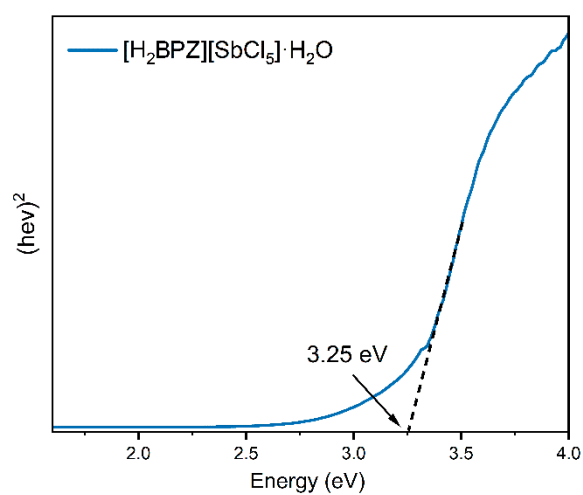

**Figure S4.** The experimental direct band gap of  $[\text{H}_2\text{BPZ}][\text{SbCl}_5] \cdot \text{H}_2\text{O}$  calculated as 3.25 eV.

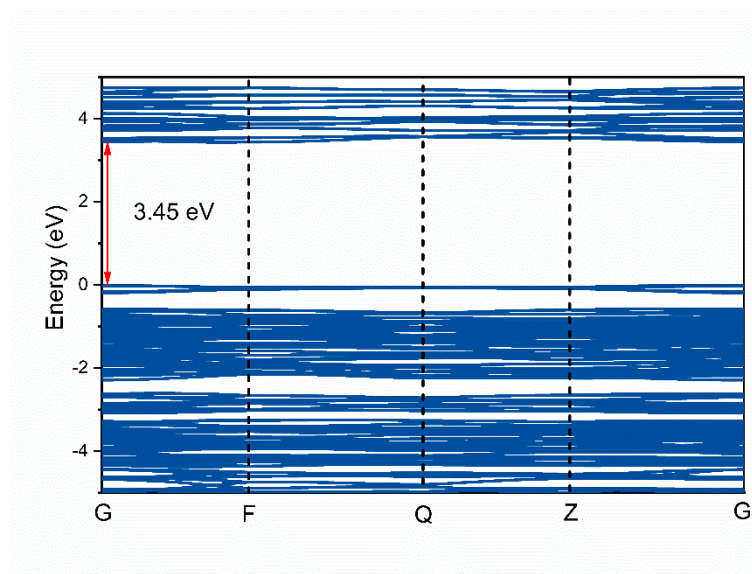

**Figure S5.** The band structure of  $[\text{H}_2\text{BPZ}][\text{SbCl}_5] \cdot \text{H}_2\text{O}$  and the direct band gap is calculated as 3.45 eV.

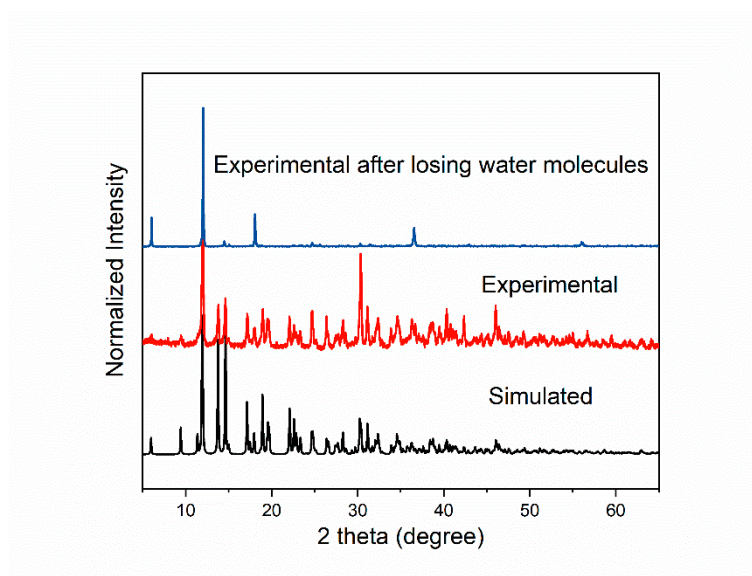

**Figure S6.** The simulated (bottom) and experimental (middle) PXRD patterns for  $[\text{H}_2\text{BPZ}][\text{SbCl}_5] \cdot \text{H}_2\text{O}$ , and experimental PXRD pattern for  $[\text{H}_2\text{BPZ}][\text{SbCl}_5]$  (top).

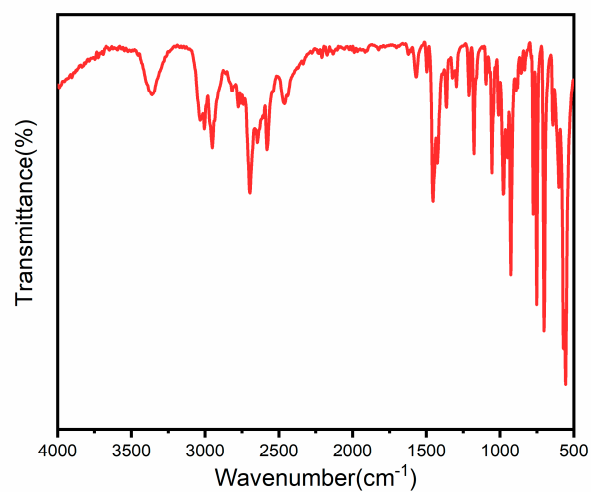

**Figure S7.** FTIR spectrum of [H<sub>2</sub>BPZ][SbCl<sub>5</sub>]•H<sub>2</sub>O crystal powder at RT.
